# Supplementary material for: Obesity-Associated Differentially Methylated Regions in Colon Cancer
Source: MDPI journal article supplement (doi:10.3390/jpm12050660), 2022-04-20
Supplement: s1 [file s1]

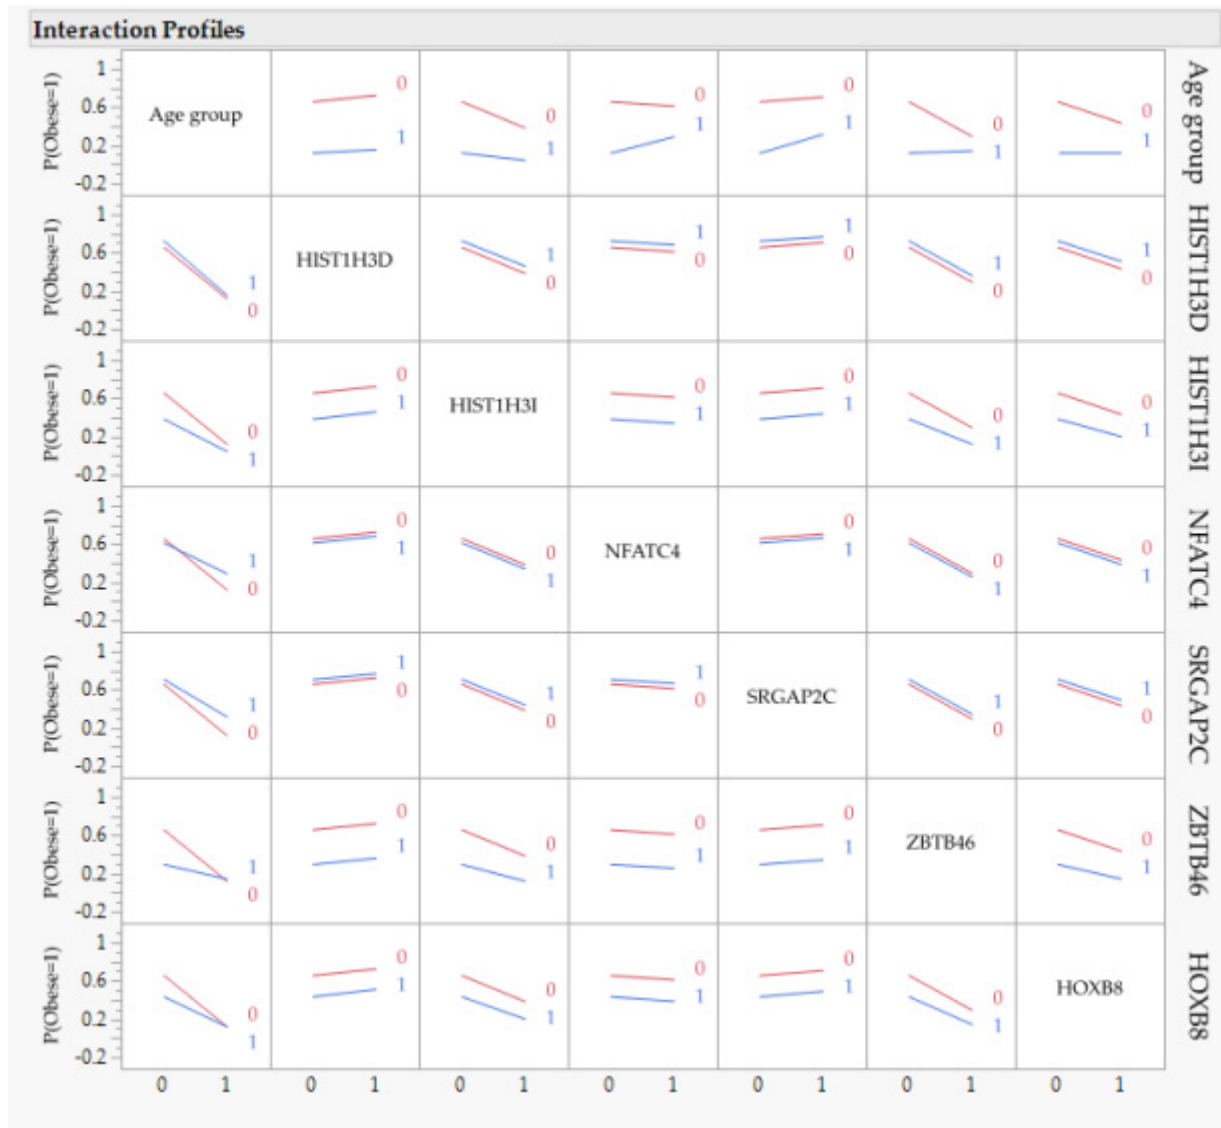

**Figure S1.** Interaction profile matrix for generalized regression model parameters. Note: age group 0 = below median (younger). Red lines indicate younger cases; blue lines indicate older.

**Table S1.** Genes associated with top hypo-methylated differentially methylated regions (DMR) between groups.

| Group      | Gene                  | # CpG                  | DMR Location             |          | Str | Dis. to TSS | Methylation |       |       | Gene Function                            |                                                                 |
|------------|-----------------------|------------------------|--------------------------|----------|-----|-------------|-------------|-------|-------|------------------------------------------|-----------------------------------------------------------------|
|            |                       |                        | Coordinate               | Region   |     |             | CTL *       | NOB * | OB *  |                                          | p                                                               |
| NOB/ CTRL  | RUBCN <sup>f</sup>    | 12                     | chr3:197736464-197737273 | Promoter | -   | 554         | 13.64       | 5.96  | -     | <0.001                                   | Impairs the autophagosome maturation process                    |
|            | USP4 <sup>s</sup>     | 11                     | chr3:49339907-49340421   | Promoter | -   | 350         | 20.48       | 10.67 | -     | <0.001                                   | Protein metabolism, interacts with ADORA2A                      |
|            | ZNF852 <sup>o</sup>   | 3                      | chr3:44510396-44510667   | Promoter | -   | 31          | 5.18        | 2.81  | -     | 0.002                                    | Transcription regulation, may be a pseudogene                   |
|            | RTTEL1 <sup>e</sup>   | 4                      | chr20:63687006-63687305  | Intron   | +   | -29,196     | 38.81       | 21.38 | -     | <0.001                                   | Known to protect telomeres during DNA replication               |
|            | CIITA <sup>a</sup>    | 9                      | chr16:10878925-10879448  | Intron   | +   | -1727       | 37.81       | 21.57 | -     | <0.001                                   | Positive regulator of class II major histocompatibility complex |
|            | HIST1H3J              | 5                      | chr6:27890388-27890786   | Promoter | -   | -6          | 17.85       | 10.65 | -     | 0.013                                    | Transcription regulation, DNA repair, linked to alcoholism      |
|            | MST1R <sup>d</sup>    | 6                      | chr3:49902666-49902998   | Promoter | -   | -639        | 73.49       | 47.28 | -     | <0.001                                   | Regulates cell survival, migration, and differentiation         |
|            | MRFAP1L1 <sup>c</sup> | 20                     | chr4:6709221-6710066     | Promoter | -   | 186         | 23.03       | 15.00 | -     | <0.001                                   | Interacts with MORF4L1 oncogene                                 |
|            | B3GNTL1               | 12                     | chr17:83051075-83052123  | Promoter | -   | 313         | 31.42       | 20.53 | -     | <0.001                                   | Protein metabolism, expressed in breast cancer                  |
|            | GNG7 <sup>b</sup>     | 6                      | chr19:2607727-2607969    | Intron   | -   | -94,740     | 56.97       | 37.39 | -     | <0.001                                   | Lipid anchor, GTPase activity, may inhibit insulin secretion    |
| OB/ CTRL   | RUBCN <sup>f</sup>    | 12                     | chr3:197736464-197737273 | Promoter | -   | 554         | 13.64       | -     | 5.60  | <0.001                                   | Impairs the autophagosome maturation process                    |
|            | RTTEL1 <sup>e</sup>   | 4                      | chr20:63687006-63687305  | Intron   | +   | -29,196     | 38.81       | -     | 19.09 | <0.001                                   | Anti-recombinase functioning MMR                                |
|            | USP4 <sup>s</sup>     | 11                     | chr3:49339907-49340421   | Promoter | -   | 350         | 20.48       | -     | 10.71 | <0.001                                   | Protein metabolism, over-expressed in some cancer tissues       |
|            | CIITA <sup>a</sup>    | 9                      | chr16:10878925-10879448  | Intron   | +   | -1727       | 37.81       | -     | 21.61 | <0.001                                   | Tumor suppression (TSG)                                         |
|            | ZNF852 <sup>o</sup>   | 3                      | chr3:44510396-44510667   | Promoter | -   | 31          | 5.18        | -     | 3.24  | 0.012                                    | Transcription regulation                                        |
|            | MST1R <sup>d</sup>    | 6                      | chr3:49902666-49902998   | Promoter | -   | -639        | 73.49       | -     | 46.15 | <0.001                                   | Regulates cell survival, migration, and differentiation         |
|            | GNG7 <sup>b</sup>     | 6                      | chr19:2607727-2607969    | Intron   | -   | -94,740     | 56.97       | -     | 35.90 | <0.001                                   | Lipid anchor, GTPase activity, may inhibit insulin secretion    |
|            | ZBTB46                | 3                      | chr20:63802584-63802850  | Intron   | -   | -28,364     | 84.10       | -     | 53.10 | <0.001                                   | Tumor Suppressor, transcription repressor                       |
|            | NUDT7                 | 9                      | chr16:77722519-77722784  | Promoter | +   | -5          | 12.02       | -     | 7.65  | <0.001                                   | Lipid and fatty acid metabolism                                 |
|            | MRFAP1L1 <sup>c</sup> | 20                     | chr4:6709221-6710066     | Promoter | -   | 186         | 23.03       | -     | 14.70 | <0.001                                   | Interacts with MORF4L1 oncogene                                 |
| OB/<br>NOB | HIST3H2A              | 25                     | chr1:228457406-228458733 | Promoter | -   | 860         | -           | 8.61  | 6.80  | 0.086                                    | DNA repair, MMR                                                 |
|            | HIST3H2BB             | 25                     | chr1:228457406-228458733 | Promoter | +   | 701         | -           | 8.61  | 6.80  | 0.086                                    | DNA repair, MMR                                                 |
|            | HOXB8                 | 18                     | chr17:48613028-48614660  | Promoter | -   | -279        | -           | 14.47 | 11.48 | 0.026                                    | Oncogene                                                        |
|            | HIST1H3I              | 11                     | chr6:27871920-27872291   | Promoter | -   | -24         | -           | 17.43 | 14.47 | 0.174                                    | Oncogene—linked to alcoholism                                   |
|            | TUBB2A                | 3                      | chr6:3156725-3156933     | Intron   | -   | -593        | -           | 9.93  | 8.26  | 0.127                                    | Tubulin, beta 2A class IIa, GTP binding                         |
|            | TMCO1                 | 13                     | chr1:165768595-165769112 | Promoter | -   | 210         | -           | 5.49  | 4.59  | 0.413                                    | Plays a key role in calcium homeostasis                         |
|            | PRAC2                 | 4                      | chr17:48723583-48723926  | Promoter | +   | 109         | -           | 10.32 | 8.63  | 0.304                                    | Unknown function - expressed in colon and prostate CA           |
|            | AMOTL2                | 4                      | chr3:134364018-134364359 | Intron   | -   | -10,235     | -           | 15.79 | 13.38 | 0.313                                    | Inhibits the Wnt/beta-catenin signaling pathway                 |
|            | ARL4D                 | 13                     | chr17:43398852-43399347  | Promoter | +   | 107         | -           | 8.03  | 6.82  | 0.236                                    | Overexpression suppresses adipogenesis                          |
| HIST1H3D   | 13                    | chr6:26196842-26197309 | Promoter                 | -        | 59  | -           | 12.02       | 10.26 | 0.063 | Oncogene—linked to glioma and alcoholism |                                                                 |

Note: Str—DNA strand; Dis to TSS—distance (in base pairs) to transcription start site from DMR start; \*—mean methylation percent. Items in blue represent genes that can be annotated to adiposity or glucose-related ontologies, green to cancer-related ontologies, and red to both cancer and adipose/glucose-related ontologies. DMRs with matching superscript letters have significant methylation in more than one comparison group; <sup>o</sup>—gene has DMR with significant hyper- and hypo-methylation.

**Table S2.** Genes associated with top hyper-methylated differentially methylated regions (DMR) between groups.

| Group        | Gene                       | #<br>CpG | DMR Location              |          |     | Dis. to<br>TSS | Methylation |       |       |        | Gene function                                                 |
|--------------|----------------------------|----------|---------------------------|----------|-----|----------------|-------------|-------|-------|--------|---------------------------------------------------------------|
|              |                            |          | Coordinate                | Region   | Str |                | CTL *       | NOB * | OB *  | p      |                                                               |
| NOB/<br>CTRL | <i>ZNF625<sup>i</sup></i>  | 8        | chr19:12156183-12156871   | Promoter | -   | 142            | 4.70        | 49.50 | -     | <0.001 | Transcription regulation                                      |
|              | <i>SLC6A15<sup>f</sup></i> | 4        | chr12:84911884-84912097   | Intron   | -   | -779           | 6.33        | 44.91 | -     | <0.001 | Transports neutral amino acids                                |
|              | <i>ZNF43<sup>i</sup></i>   | 5        | chr19:21851592-21852141   | CDS      | -   | 15,933         | 6.57        | 40.47 | -     | <0.001 | Transcription regulation                                      |
|              | <i>RSPO3<sup>e</sup></i>   | 10       | chr6:127118862-127119927  | Promoter | +   | -258           | 7.42        | 42.06 | -     | <0.001 | Oncogene, regulation of Wnt pathway                           |
|              | <i>TMEFF1<sup>h</sup></i>  | 3        | chr9:100473078-100474345  | Promoter | +   | 35             | 3.31        | 17.87 | -     | 0.011  | May be a tumor suppressor                                     |
|              | <i>GPM6A<sup>d</sup></i>   | 5        | chr4:176001924-176002479  | Promoter | -   | 147            | 8.09        | 41.80 | -     | <0.001 | Regulation of endocytosis                                     |
|              | <i>GALNT13<sup>c</sup></i> | 3        | chr2:153872431-153872815  | Intron   | +   | -518           | 9.17        | 47.15 | -     | <0.001 | Carbohydrate, protein, and metal ion metabolism               |
|              | <i>ADHFE1<sup>a</sup></i>  | 10       | chr8:66432262-66432754    | Promoter | +   | 224            | 12.79       | 64.20 | -     | <0.001 | Involved with TCA and cellular respiratory cycle              |
| OB/<br>CTRL  |                            |          |                           |          |     |                |             |       |       | <0.001 | Unknown function- interacts with OTX1 gene in prostate cancer |
|              | <i>FAM72B<sup>b</sup></i>  | 9        | chr1:121183931-121187361  | CDS      | -   | 3021           | 6.62        | 29.19 | -     |        |                                                               |
|              | <i>SRGAP2C<sup>s</sup></i> | 9        | chr1:121183931-121187361  | Promoter | +   | 879            | 6.62        | 29.19 | -     | <0.001 | TSG—cell migration; expressed in pancreas                     |
|              | <i>ZNF625<sup>i</sup></i>  | 8        | chr19:12156183-12156871   | Promoter | -   | 142            | 4.70        | -     | 50.32 | <0.001 | Transcription regulation                                      |
|              | <i>SLC6A15<sup>f</sup></i> | 4        | chr12:84911884-84912097   | Intron   | -   | -779           | 6.33        | -     | 42.98 | <0.001 | Transports neutral amino acids                                |
|              | <i>ZNF43<sup>i</sup></i>   | 5        | chr19:21851592-21852141   | CDS      | -   | 15,933         | 6.57        | -     | 40.67 | <0.001 | Transcription regulation                                      |
|              | <i>RSPO3<sup>e</sup></i>   | 10       | chr6:127118862-127119927  | Promoter | +   | -258           | 7.42        | -     | 41.99 | <0.001 | Oncogene, regulation of Wnt pathway                           |
|              | <i>TMEFF1<sup>h</sup></i>  | 3        | chr9:100473078-100474345  | Promoter | +   | 35             | 3.31        | -     | 18.13 | 0.013  | May be a tumor suppressor                                     |
| OB/<br>NOB   | <i>GPM6A<sup>d</sup></i>   | 5        | chr4:176001924-176002479  | Promoter | -   | 147            | 8.09        | -     | 42.41 | <0.001 | Regulation of endocytosis                                     |
|              | <i>GALNT13<sup>c</sup></i> | 3        | chr2:153872431-153872815  | Intron   | +   | -518           | 9.17        | -     | 47.94 | <0.001 | Carbohydrate, protein, and metal ion metabolism               |
|              | <i>ADHFE1<sup>a</sup></i>  | 10       | chr8:66432262-66432754    | Promoter | +   | 224            | 12.79       | -     | 65.72 | <0.001 | Involved with TCA and cellular respiratory cycle              |
|              |                            |          |                           |          |     |                |             |       |       | <0.001 | Unknown function- interacts with OTX1 gene in prostate cancer |
|              | <i>FAM72B<sup>b</sup></i>  | 9        | chr1:121183931-121187361  | CDS      | -   | 3021           | 6.62        | -     | 33.34 |        |                                                               |
|              | <i>SRGAP2C<sup>s</sup></i> | 9        | chr1:121183931-121187361  | Promoter | +   | 879            | 6.62        | -     | 33.34 | <0.001 | TSG—cell migration; expressed in pancreas                     |
|              | <i>GNPDA2</i>              | 12       | chr4:44726016-44726702    | Promoter | -   | 107            | -           | 7.86  | 9.74  | 0.202  | Protein metabolism                                            |
|              | <i>LSM14A</i>              | 9        | chr19:34172026-34173155   | Promoter | +   | 540            | -           | 3.44  | 4.12  | 0.088  | Essential for formation of P-bodies, immune response          |
|              | <i>ZNF426</i>              | 11       | chr19:9538258-9538734     | Promoter | -   | 107            | -           | 21.70 | 25.80 | 0.049  | Transcription regulation                                      |
|              | <i>NFATC4</i>              | 8        | chr14:24368666-24369118   | Intron   | +   | -466           | -           | 9.98  | 11.52 | 0.17   | Oncogene—adipocyte differentiation                            |
|              | <i>ZNF852<sup>o</sup></i>  | 3        | chr3:44510396-44510667    | Promoter | -   | 31             | -           | 2.81  | 3.24  | 0.31   | Transcription regulation                                      |
|              |                            |          |                           |          |     |                |             |       |       | 0.08   | Unknown function- interacts with OTX1 gene in prostate cancer |
|              | <i>FAM72B<sup>b</sup></i>  | 9        | chr1:121183931-121187361  | CDS      | -   | 3021           | -           | 29.19 | 33.34 |        |                                                               |
|              | <i>SRGAP2C<sup>s</sup></i> | 9        | chr1:121183931-121187361  | Promoter | +   | 879            | -           | 29.19 | 33.34 | 0.08   | TSG—cell migration; expressed in pancreas                     |
|              | <i>TNFAIP2</i>             | 3        | chr14:103123016-103123909 | Promoter | +   | 445            | -           | 14.28 | 16.10 | 0.441  | Mediator of inflammation and angiogenesis                     |
|              | <i>ZNF747</i>              | 7        | chr16:30534203-30535192   | Promoter | -   | 188            | -           | 7.18  | 8.07  | 0.177  | Transcription regulation                                      |
|              | <i>TUBB3</i>               | 3        | chr16:89925727-89926552   | Intron   | +   | 2448           | -           | 6.36  | 7.14  | 0.043  | Oncogene, immune response, associated with Hedgehog           |

*Note:* Str—DNA strand; Dis to TSS—distance (in base pairs) to transcription start site from DMR start; \*—mean methylation percent. Items in blue represent genes that can be annotated to adiposity or glucose-related ontologies, green to cancer-related ontologies, and red to both cancer and adipose/glucose-related ontologies. DMRs with matching superscript letters have significant methylation in more than one comparison group; °—gene has DMR with significant hyper- and hypo-methylation
